# Supplementary material for: Fusarium verticillioides and Aspergillus flavus Co-Occurrence Influences Plant and Fungal Transcriptional Profiles in Maize Kernels and In Vitro
Source: MDPI journal article supplement (doi:10.3390/toxins13100680), 2021-09-24
Supplement: s1 [file s1]

# Supplementary Materials: *Fusarium verticillioides* and *Aspergillus flavus* Co-Occurrence Influences Plant and Fungal Transcriptional Profiles in Maize Kernels and *in Vitro*

Alessandra Lanubile, Paola Giorni, Terenzio Bertuzzi, Adriano Marocco and Paola Battilani

**Table S1:** Analysis of variance (ANOVA) of aflatoxin B1 (AFB1) contamination in maize kernels after 21 days of incubation in the different theses considered (mock, inoculation with *Aspergillus flavus* (AF), inoculation with *A. flavus* and *Fusarium verticillioides* (AF+FV) at three different temperatures (20, 25 and 30 °C). Data refer to mean data; all experiments were conducted with three replicates. \* $P \leq 0.05$ ; \*\*  $P \leq 0.01$ .

| Kernel assay       | AFB1   |
|--------------------|--------|
| <b>THESIS</b>      | **     |
| MOCK               | 0.5 C  |
| AF                 | 96.8 A |
| AF+FV              | 3.3 B  |
| <b>TEMPERATURE</b> | n.s.   |
| 20°C               | 109.7  |
| 25°C               | 11.7   |
| 30°C               | 7.4    |

**Table S2:** Analysis of variance (ANOVA) of fumonisins B1+B2 (FBs) and aflatoxin B1 (AFB1) contamination in artificial liquid medium (PDB) after 21 days of incubation in the different theses considered (inoculation with *Fusarium verticillioides* (FV), inoculation with *Aspergillus flavus* (AF), inoculation with *A. flavus* and *F. verticillioides* (AF+FV) at three different temperatures (20, 25 and 30 °C). \* $P \leq 0.05$ ; \*\*  $P \leq 0.01$ .

| In vitro assay     | FBs      | AFB1    |
|--------------------|----------|---------|
| <b>THESIS</b>      | **       |         |
| FV                 | 26424 A  |         |
| AF+FV              | 2665 B   |         |
| <b>THESIS</b>      |          | *       |
| AF                 |          | 56171 A |
| AF+FV              |          | 12130 B |
| <b>TEMPERATURE</b> | *        | n.s.    |
| 20°C               | 19144 A  | 23367   |
| 25°C               | 18663 AB | 44403   |
| 30°C               | 5823 B   | 34684   |
